# Supplementary material for: How Medical Students Use AI Tools for Studying: Insights from a Digital Diary Study
Source: Research Square preprint supplement (doi:10.21203/rs.3.rs-7295158/v1), 2025-10-01
Supplement: Supplementary file 1 [file df165538d05c17201d0107a9.docx]

AI Usage Amongst Medical Students Intake Survey

**Section 1: Informed Consent**

You are being asked to participate in this research study because you are a medical student who is currently enrolled in an accredited institution. The purpose of this study is to evaluate the adoption and utilization of artificial intelligence (AI) tools by students in their academic and clinical training.

**Study Procedures:** If you agree to participate in this study, you will be asked to complete an online intake survey followed by a series of digital diary entries regarding your AI usage. Answers will be logged anonymously using a secure cloud based file. We will combine the information you provide with that of other participants and report on the outcomes and trends we observe.

**Benefits and Risks:** There are no known risks to participation in this study. All data will be anonymized and stored securely to protect confidentiality.

The potential benefit of participating in this study includes contributing to research that may shape the future integration of AI tools in medical education. Your insights could help inform strategies for institutions to better prepare healthcare professionals for an AI-driven healthcare environment.

**Confidentiality:** Should you choose to participate, the research team will analyze the data, but your responses will remain confidential, and no names will be included in any reports. All data will be stored in a secure cloud-based system and only authorized research team members will have access.

**Requirements:** Participants must be currently enrolled as a medical student at an accredited 4-year institution, in any of their 4 years, including any research years. (no LOA or leave)

**Compensation:** Participants who complete the intake survey and all digital diary entries will be eligible to receive 1 of 100 $25 dollar Visa Gift Cards.

**Consent to Receive SMS/MMS Notifications:** By providing your mobile number, you agree that the research team may send you periodic text messages containing but not limited to important information, updates, deals, and specials. Message and data rates may apply. You will receive up to two messages per month. You may unsubscribe at any time by texting the word STOP to the study number. You may receive a subsequent message confirming your opt-out request. Though we will never charge you for the text messages you receive, depending on your phone plan, you may see some charges from your mobile provider. Please reach out to your wireless provider if you have questions about your text or data plan.

**Privacy Policy:** No mobile information will be shared with third parties/affiliates for marketing/promotional purposes. All the above categories exclude text messaging originator opt-in data consent: this information will not be shared with any third parties.

**By entering your name below, you consent to participate in this study and agree to the terms outlined in the consent form above.**

Short answer text

**Section 2: Demographics**

**Please enter your cell phone number.** (Your cellphone number will serve as your Research ID for the duration of this study. This number will also be used for additional digital communication to include the distribution of your digital diary).

Input: XXX-XXX-XXXX

**What is your age?**

Short answer text

**What is your gender? (Select one)**

Male

Female

Non-Binary

Prefer Not To Say

Other- Short answer text

**What is your current level of Medical Education? (Select one)**

MS1

MS2

MS3

MS4

Research Year

**Which Touro campus do you attend? (Select one)**

TUC

TUN

**What is your primary setting of study? (Select one)**

Solo

In a Group

Other- Short answer text

**Section 3- AI Background**

This section contains 6 questions to better understand your exposure and specific attitudes to AI previously.

**1. How would you describe your prior exposure to AI? (Select one)**

None

Minimal

Moderate

Extensive

**2. Have you heard of AI tools such as ChatGPT and Google Gemini being used by students for studying and school work during their medical education or clinical training? (Select one)**

Yes

No

**3. Do you think that AI tools should be *used informally* by students during their medical education? (Select one)**

Strongly Disagree

Somewhat Disagree

Somewhat Agree

Strongly Agree

**4. Do you think that AI tools should be *formally* incorporated into curriculum by professors during medical education? (Select one)**

Strongly Disagree

Somewhat Disagree

Somewhat Agree

Strongly Agree

**5. Have you ever received any formal training on the use of AI tools for studying or school work in medical education or clinical practice? (Select one)**

Yes, through my medical school curriculum

Yes, through external workshops or courses

No, I haven’t received any formal training

**6. Have you ever used any AI tools for studying or school work during any of your medical education or clinical training? (Select one)**

Yes - Go to section 4 (Specific Use of AI)

No - Submit form

**Section 4: Specific Use of AI**

This section contains 6 questions to better understand your current utilization of AI.

**1. Please select what forms of AI have been used? (Select all that apply)**

Chat GPT

Google Gemini

AMBOSS AI

UpToDate Clinical AI

Notebook LM

Other- Short answer text

**2. How many days per week would you say that you use any AI tools during the semester for your studying or school work? (Select one)**

Not at all

1-2x a week

3-5x a week

6-7x a week

**3. Do you think your use of AI tools for studying and school work is positively impacting your learning? (Select one)**

Strongly Disagree

Somewhat Disagree

Somewhat Agree

Strongly Agree

**4. Do you think your use of AI tools for studying and school work is positively impacting your clinical reasoning? (Select one)**

Strongly Disagree

Somewhat Disagree

Somewhat Agree

Strongly Agree

**5. In which of the following ways have you used AI tools for studying, school work, or any of your medical education or clinical training? Select all that apply.**

Learning more about complex medical concepts

Getting simplified explanations of difficult concepts/topics

Generating mnemonic/s or memory aids

Creating study plans or schedules

Summarizing lecture notes or textbooks

Interpreting lab results or imaging findings

Simulating patient interactions or clinical scenarios

Generating practice questions for exams like the USMLE/COMLEX/COMAT

Using spaced repetition or active recall techniques

Generating clinical flowcharts or algorithms for treatment planning

Creating summaries of diseases and treatments

Answering practice questions

Completing assignments for class

**6. Do you use AI tools in any other way than those listed above?**

Short answer text

AI and Medical Students: Digital Diary 1-7

**Please enter your cell phone number.** (This is the same number at which this survey was received.) Input: XXX-XXX-XXXX

**Did you use any AI tools in the past 72 hours?**

Yes: Go to section 1 (AI Tool Usage)

No: Submit form

**Section 1: AI Tool Usage**

**1. Please select what forms of AI have been used? (Select all that apply)**

Chat GPT

Google Gemini

AMBOSS AI

UpToDate Clinical AI

Notebook LM

Other- Short answer text

**2. In which of the following ways did you use any AI tools? Please select all that apply.**

Learning more about complex medical concepts

Getting simplified explanations of difficult concepts/topics

Generating mnemonic/s or memory aids

Creating study plans or schedules

Summarizing lecture notes or textbooks

Interpreting lab results or imaging findings

Simulating patient interactions or clinical scenarios

Generating practice questions for exams like the STEP/COMLEX/COMAT

Using spaced repetition or active recall techniques

Generating clinical flowcharts or algorithms for treatment planning

Creating summaries of diseases and treatments

Answering practice questions

Completing assignments for class

Other- Short answer text

**3. Approximately what percentage of your total studying/school work time today was spent using (or being assisted by?) AI? (Select one)**

0%, 10%, 20%, 30%, 40%, 50%, 60%, 70%, 80%, 90%, 100%

**4. Are you currently in a “testing period” (1 week leading up to an in-house exam or a dedicated period preparing for board exams like USMLE Step 1/2, COMLEX 1/2, etc.)? (Select one)**

Yes

No

**5. Are you currently on a break from school or rotations (school is not in session at this time, ie: Spring Break)? (Select one)**

Yes

No

**6. Approximately how many minutes did you spend studying in the last 48 hours?**

**0–60 minutes (Select one)**

61–120 minutes

121–180 minutes

181–240 minutes

More than 240 minutes

**7. Approximately how many minutes did you spend using any AI tools for studying in the last 48 hours? (Select one)**

0 minutes

1–30 minutes

31–60 minutes

61–90 minutes

More than 90 minutes
